# Supplementary material for: Red-light photosensitized cleavage of DNA by (l-lysine)(phenanthroline base)copper(ii) complexes
Source: Royal Society of Chemistry journal article supplement (doi:10.1039/b506310h), 2005-01-01
Supplement: b506310h.pdf [file b506310h.pdf]

---

## **Red-light photosensitized cleavage of DNA by (L-lysine)(phenanthroline base)copper(II) complexes**

---

**Ashis K. Patra, Munirathinam Nethaji and Akhil R. Chakravarty\***

*Department of Inorganic and Physical Chemistry, Indian Institute of Science, Bangalore 560012, India.  
Fax: +91-80-2360683; E-mail: arc@ipc.iisc.ernet.in.*

Supporting Information

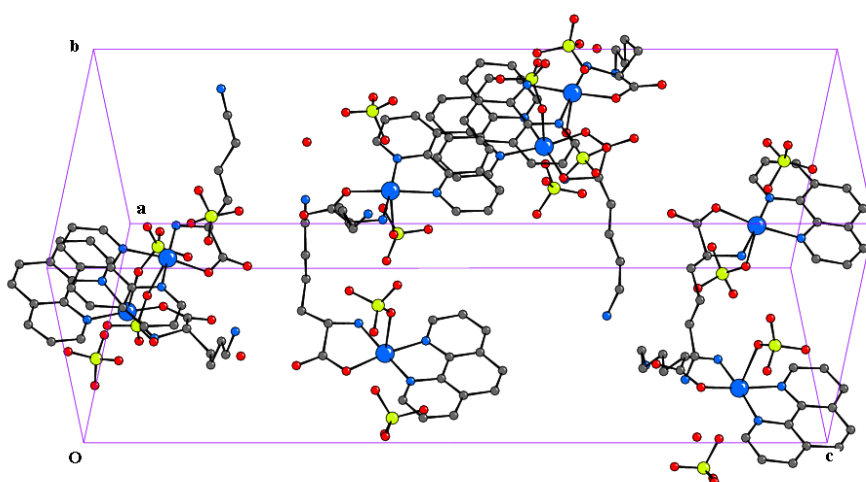

Fig. S1 Unit cell packing diagram of 2·0.5 H<sub>2</sub>O

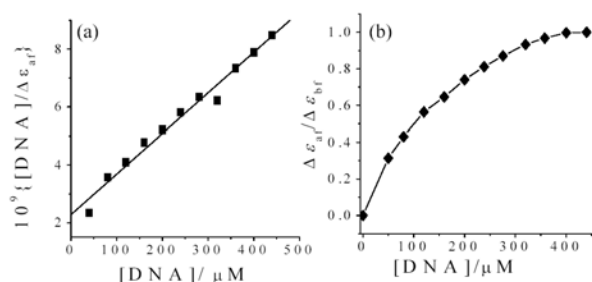

Fig. S2 (a) Plot of  $[DNA]/(\Delta\epsilon_{af})$  vs.  $[DNA]$ , obtained from absorption titration of **2** ( $40 \mu\text{M}$ ) with CT-DNA in Tris-buffer (pH 7.2). (b) Plot of  $\Delta\epsilon_{af}/\Delta\epsilon_{bf}$  vs.  $[DNA]$ , where,  $\Delta\epsilon_{af} = (\epsilon_a - \epsilon_f)$  and  $\Delta\epsilon_{bf} = (\epsilon_b - \epsilon_f)$ .

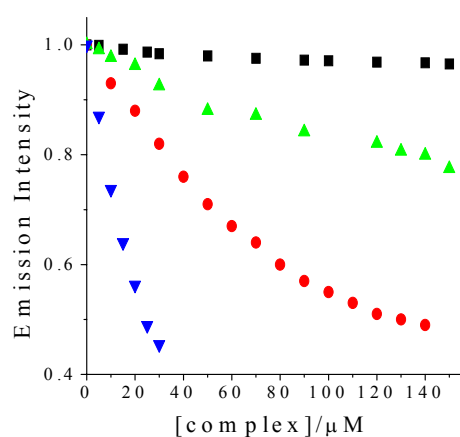

Fig. S3 Effect of addition of  $[\text{Cu}(\text{L-lys})\text{B}(\text{ClO}_4)](\text{ClO}_4)$  ( $\text{L} = \text{bpy}$ , **1**, ■; phen, **2**, ▲; dpq, **3**, ●; and dppz, **4**, ▼) to the emission intensity of the CT-DNA ( $300 \mu\text{M}$ ) bound ethidium bromide ( $1.3 \mu\text{M}$ ) at different complex concentrations in  $50 \text{ mM}$  Tris-HCl buffer (pH 7.2).

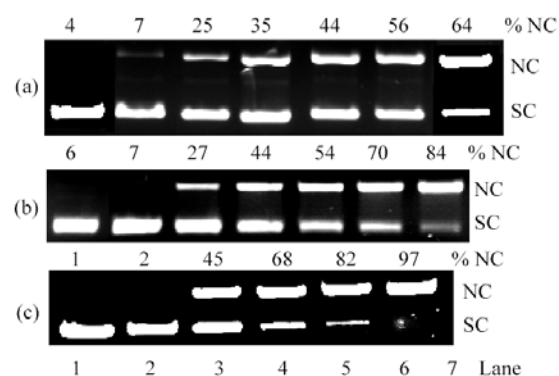

Fig. S4 Gel electrophoresis diagram showing the cleavage of SC DNA ( $0.5 \mu\text{g}$ ) by complexes **2** (a); **3** (b) and **4** (c) on UV-light irradiation ( $365 \text{ nm}$ ,  $12 \text{ W}$ ) using  $25 \mu\text{M}$  concentration of the complexes: Lane 1, DNA control ( $60 \text{ min}$ ); Lane 2, DNA + complex ( $60 \text{ min}$ ); Lane 3, DNA + complex ( $15 \text{ min}$ ); Lane 4, DNA + complex ( $30 \text{ min}$ ); Lane 5, DNA + complex ( $45 \text{ min}$ ); Lane 6, DNA + complex ( $60 \text{ min}$ ), Lane 7, DNA + complex ( $90 \text{ min}$ ).

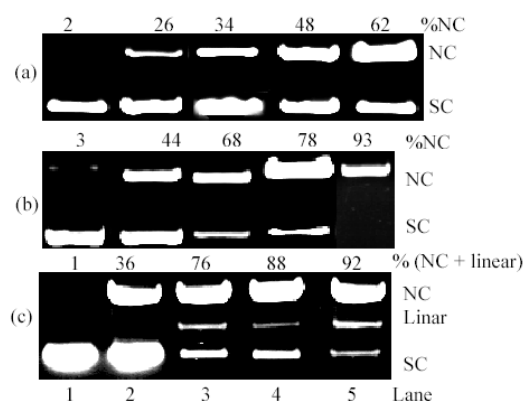

Fig. S5 Gel electrophoresis diagram showing the cleavage of SC DNA ( $0.5 \mu\text{g}$ ) by complexes **2** (a); **3** (b) and **4** (c) on red-light exposure ( $694 \text{ nm}$ , ruby laser) using  $50 \mu\text{M}$  concentration of the complexes: Lane 1, DNA control ( $60 \text{ min}$ ); Lane 2, DNA + complex ( $15 \text{ min}$ ); Lane 3, DNA + complex ( $30 \text{ min}$ ); Lane 4, DNA + complex ( $45 \text{ min}$ ); Lane 5, DNA + complex ( $60 \text{ min}$ ).
